# Supplementary material for: Capping CsPbBr3 with ZnO to improve performance and stability of perovskite memristors
Source: Springer Nature journal article supplement (doi:10.1007/s12274-016-1288-2), 2016-10-17
Supplement: 12274_2016_1288_MOESM1_ESM.pdf [file 12274_2016_1288_MOESM1_ESM.pdf]

## Electronic Supplementary Material

# Capping CsPbBr<sub>3</sub> with ZnO to improve performance and stability of perovskite memristors

Ye Wu<sup>1,§</sup>, Yi Wei<sup>1,§</sup>, Yong Huang<sup>1</sup>, Fei Cao<sup>1</sup>, Dejian Yu<sup>1</sup>, Xiaoming Li<sup>1,2</sup> (✉), and Haibo Zeng<sup>1,2</sup> (✉)

<sup>1</sup> Institute of Optoelectronics & Nanomaterials, Herbert Gleiter Institute of Nanoscience, Jiangsu Key Laboratory of Advanced Micro & Nano Materials and Technology, College of Material Science and Engineering, Nanjing University of Science and Technology, Nanjing 210094, China

<sup>2</sup> State Key Laboratory of Mechanics and Control of Mechanical Structures, College of Materials Science and Technology, Nanjing University of Aeronautics and Astronautics, Nanjing 210016, China

<sup>§</sup> These authors contributed equally to this work.

Supporting information to DOI 10.1007/s12274-016-1288-2

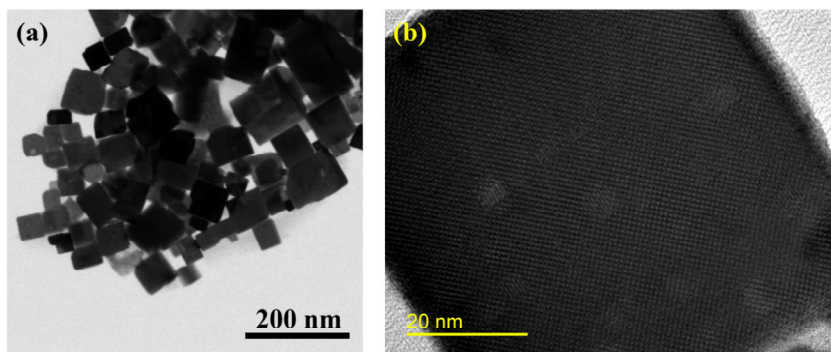

**Figure S1** (a) TEM image of the room temperature processed nanoparticles. (b) HRTEM image of a single particle, which exhibits high crystallinity.

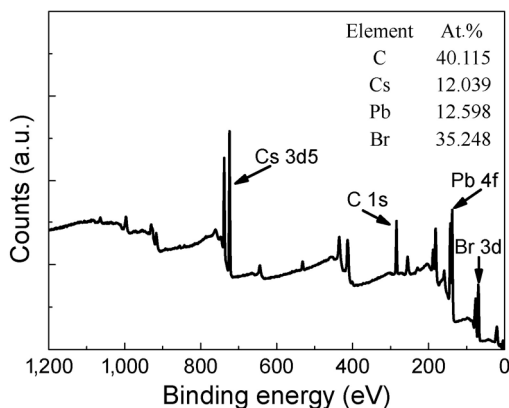

**Figure S2** XPS survey spectrum of CsPbBr<sub>3</sub>. The inset shows the atomic ratio of corresponding elements that the particles are stoichiometric.

Address correspondence to Haibo Zeng, zeng.haibo@njust.edu.cn; Xiaoming Li, xml\_mse@126.com

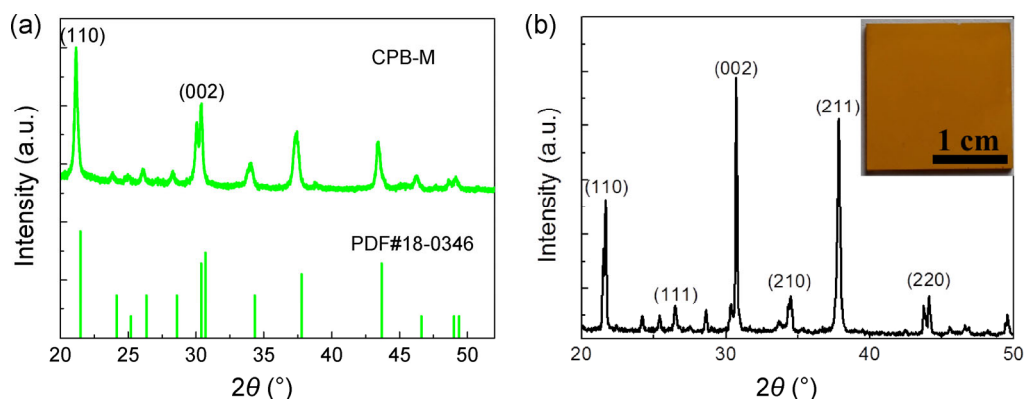

**Figure S3** (a) XRD pattern of randomly aggregate nanoparticles. (b) XRD pattern of the as-deposited film after treating. The inset shows the graph of corresponding sample.

## Discussion

Based on the XRD pattern, the  $\text{CsPbBr}_3$  film exhibits preferential assembly along (002) planes during the film-forming process under centrifugal force even after treating. To demonstrate the assemble degree of the NC film, we calculate the texture coefficient (TC) according to following equation

$$TC_{002} = \frac{I_{002} / I_{002}^0}{I_{002} / I_{002}^0 + I_{110} / I_{110}^0}$$

where  $TC_{002}$  is the relative texture coefficient of diffraction peaks (002) over (110),  $I_{002}$  and  $I_{110}$  are the measured diffraction intensities of (002) and (110) planes while  $I_{002}^0$  and  $I_{110}^0$  are values from standard PDF data (NO. 18-0364). The  $TC_{002}$  of the assembled film and powder (Fig. S3) are 0.73 and 0.52 respectively. The relatively higher value of  $TC_{002}$  of the NC film indicates the textured and well-aligned features. Importantly, assemble film usually exhibit high dense and low smooth, which is beneficial for optoelectronic and electronic devices.

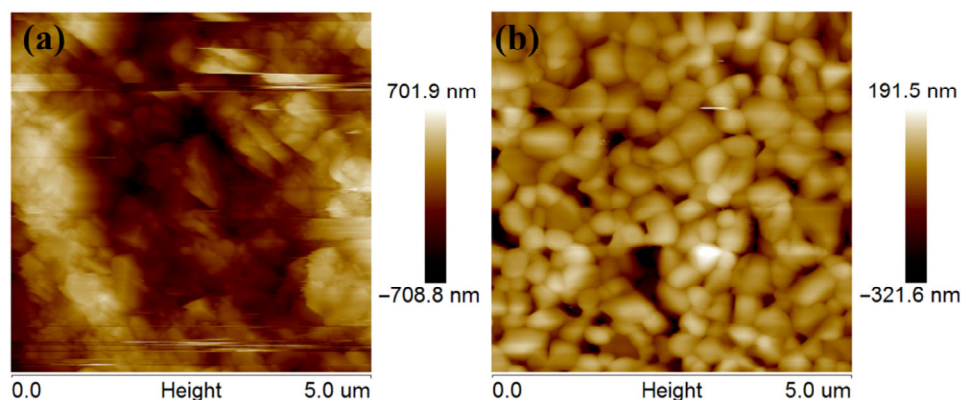

**Figure S4** AFM images of (a) untreated and (b) treated  $\text{CsPbBr}_3$  films. The roughness of the assembled perovskite film is less than 300 nm, which confirms the relative high dense and low roughness film compared to untreated films.

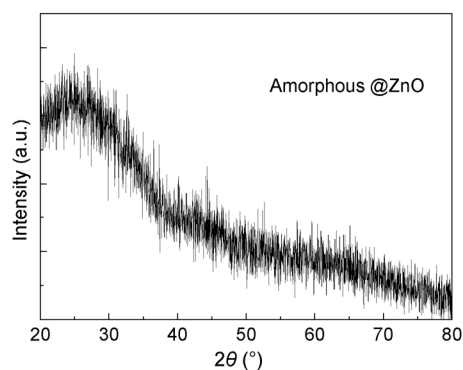

**Figure S5** XRD pattern of the ZnO film on FTO/glass substrate, exhibiting an amorphous feature.

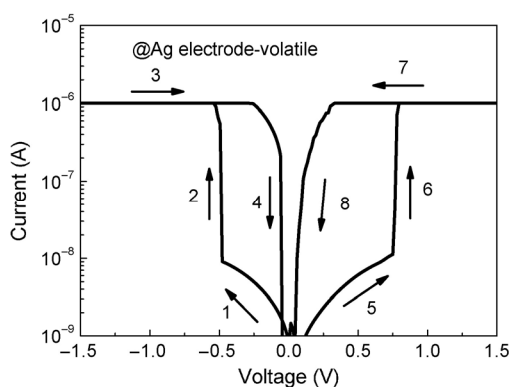

**Figure S6** A typical  $I$ - $V$  curve of a device with Ag as the top electrode. Unfortunately, all the devices exhibit volatile behavior, which might result from the reaction of Ag and perovskite.

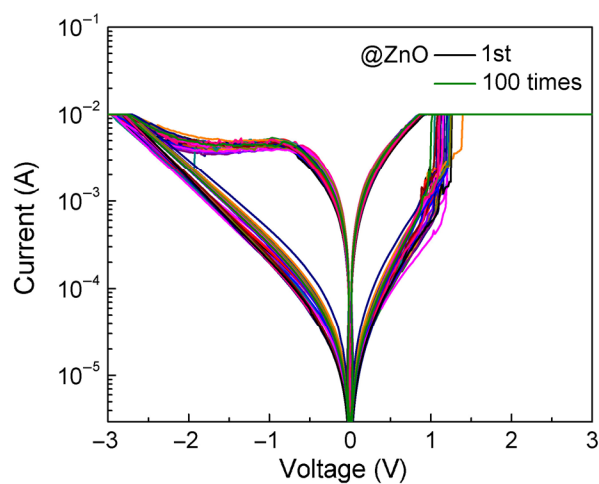

**Figure S7**  $I$ - $V$  curves of the device with only amorphous ZnO film ( $\sim 100$  nm). This device shows better reproducible and reliable nonvolatile memory for more than 100 cycling times.

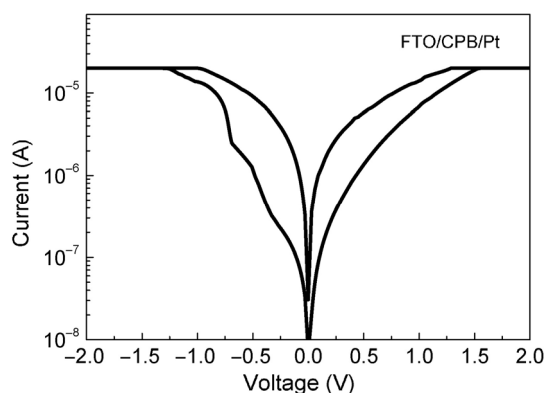

**Figure S8** Typical  $I$ - $V$  curve of FTO/CPB/Pt device. Though there is an obvious resistance switching behavior, the change is not instantaneous and the on/off ratio is very small.

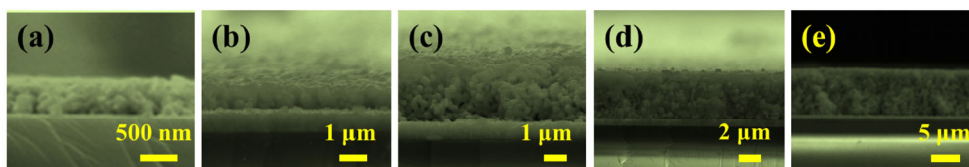

**Figure S9** Cross-sectional SEM images of CPB films with different thicknesses. Obviously, the thickness can be tuned randomly over a wide range through concentration controlling of dispersions for centrifugal casting.

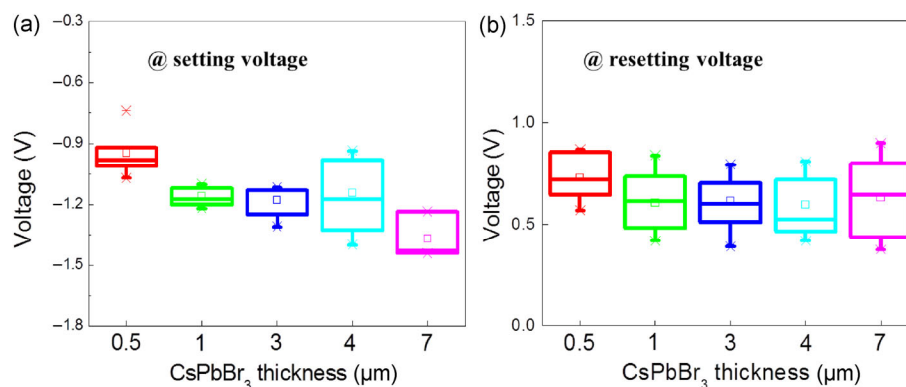

**Figure S10** (a) Set and (b) reset voltages as a function of perovskite film thickness. One can see that the setting voltage becomes larger with the increase of thickness while resetting voltage is relatively independent on thickness.

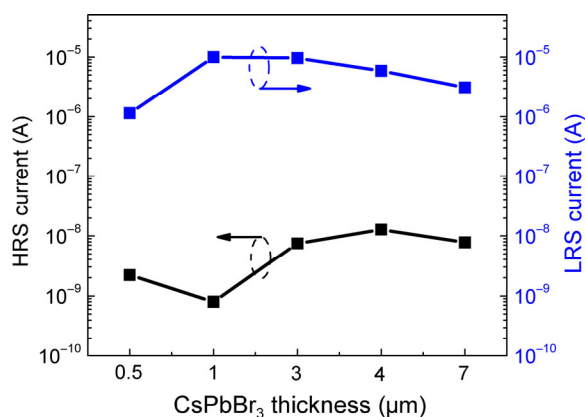

**Figure S11** HRS and LRS current as a function of CPB film thickness.

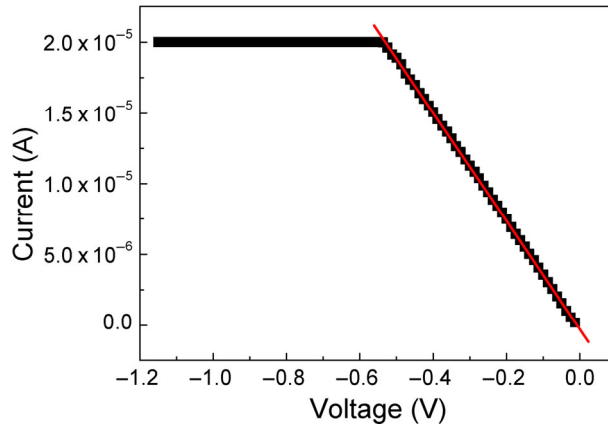

**Figure S12** *I-V* curve of LRS at the negative region for FTO/CPB/ZnO/Ni device, which shows a good linear relationship.

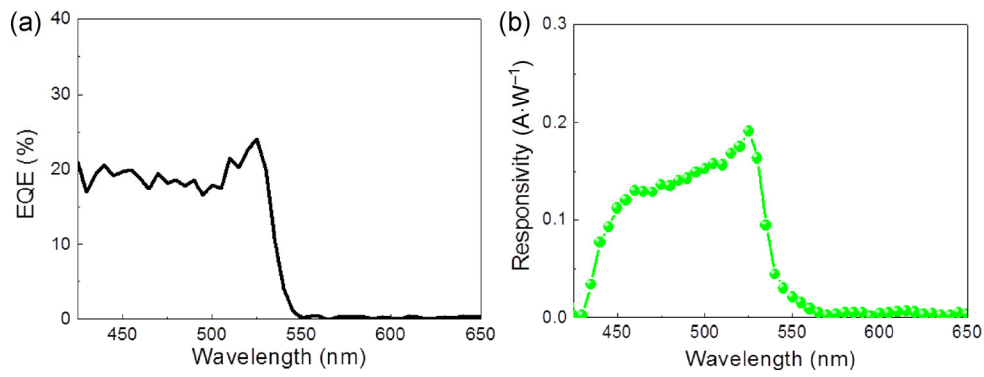

**Figure S13** EQE (a) and responsivity (b) spectra of the device, respectively. The external quantum efficiency (EQE) and responsivity versus wavelength at 0 V are shown that the maximum EQE value at 524 nm reaches 25% with a high responsivity of  $\sim 0.2 \text{ A}\cdot\text{W}^{-1}$ .

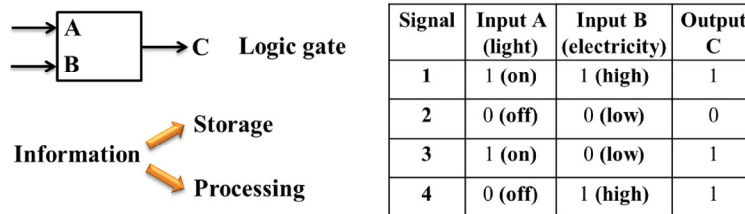

**Figure S14** Working mechanism of the logic device.
